## The relationship between vertebral number and water temperature in cod

K. Brander

Fisheries Laboratory,  
Lowestoft, Suffolk NR33 0HT, U.K.

An inverse relationship between water temperature during early development and mean vertebral number ( $\overline{VS}$ , includes urostyle) is established for cod populations throughout the North Atlantic, but the extent to which differences in  $\overline{VS}$  are inherited is unknown. The  $\overline{VS}$  of different year classes of cod from the North Sea shows some dependence on water temperature and the year class should therefore be taken into account, where possible, when seeking evidence of separation between stocks. Values of  $\overline{VS}$  for populations around the British Isles are plotted on the chart of mean March surface temperature and in general agree with the established temperature– $\overline{VS}$  relationship. Two areas for which the vertebral numbers seem anomalous are the English Channel and the northeast Irish Sea and these anomalies are discussed.

### Introduction

Since the classic paper by Schmidt (1930), an enormous amount of work has been carried out to determine the average number of vertebrae ( $\overline{VS}$ ) in different populations of cod (*Gadus morhua* L.) throughout the North Atlantic for stock separation studies (see Table 1). Differences in  $\overline{VS}$  in fish arise owing to hereditary factors and to the influence of the environment, particularly water temperature, during early life. An inherited difference in  $\overline{VS}$  between Irish Sea and North Sea plaice, reared under identical conditions, was demonstrated by Purdom and Wyatt (1969). The effect of temperature during early life has been described by Tåning (1946) who induced differences in  $\overline{VS}$  of sea trout of up to 1.5 in full brothers and sisters reared under different temperature regimes. Similar work on *Fundulus majalis* (Walbaum) was reported by Fahy (1972). The relationship between water temperature during early development of haddock and  $\overline{VS}$  has been investigated by Clark and Vladykov (1960) using extensive survey data. They concluded that a single temperature– $\overline{VS}$  relationship applies to the species throughout its range. No published relationship of this kind seems to exist for cod in spite of numerous records of  $\overline{VS}$  and frequent mention of the influence of temperature. In the present paper a temperature– $\overline{VS}$  relationship is derived and some suggestions are

made about its application to problems of stock identity.

### Results

Figure 1 shows the  $\overline{VS}$  for cod populations from all parts of the North Atlantic plotted against the surface temperature during their month of spawning. The data sources are given in Table 1. Temperature data are from Stefansson (1962), ICNAF (1968), Hydrographic Office, U.S. Navy Dept. (1944), ICES (1962), Clark and Vladykov (1960) and some of my own. Samples ranging in size from 20 to 4594 fish from a total of 70 locations throughout the North Atlantic are included. In a small number of cases the exact position of the sample and the time of spawning had to be guessed and the average monthly temperature interpolated from contour charts. It seems reasonable to expect that this will increase the error variance in the relationship rather than introducing a bias. The highest values ( $\overline{VS}$  of 55 and above) occur off Newfoundland and Labrador. For the latter area Postolaky (1968) reports that the development of eggs and larvae in the surface layer proceeds mainly at 0°C (or less). Lowest  $\overline{VS}$  are recorded from Rockall and the Bristol Channel, where average surface temperatures in March are over 8°C. The vertebral count frequencies for most samples are given in the Appendix Table 1.

Table 1. Mean vertebral counts of cod (including urostyle) in the North Atlantic.

| Source                                                                                              | Sample No. | Area of sampling | No. of fish | Mean No. of vertebrae | Standard deviation | Temperature at spawning (°C) |
|-----------------------------------------------------------------------------------------------------|------------|------------------|-------------|-----------------------|--------------------|------------------------------|
| Schmidt (1930)                                                                                      | 1          | 66°53'N 20°47'W  | 120         | 52.96                 | 0.65               | 3.5                          |
|                                                                                                     | 2          | 66°01'N 17°30'W  | 287         | 52.96                 | 0.71               | 3.0                          |
|                                                                                                     | 3          | 65°40'N 14°10'W  | 370         | 53.23                 | 0.64               | 3.5                          |
|                                                                                                     | 4          | 65°17'N 13°59'W  | 1290        | 52.85                 | 0.69               | 3.8                          |
|                                                                                                     | 5          | 64°35'N 13°15'W  | 73          | 53.26                 | 0.71               | 4.0                          |
|                                                                                                     | 6          | 63°44'N 22°57'W  | 186         | 52.73                 | 0.71               | 5.5                          |
|                                                                                                     | 7          | Faroe Plateau    | 2746        | 52.28                 | 0.62               | 6.5                          |
| Schmidt (1930)                                                                                      | 8          | 63°08'N 7°30'E   | 79          | 53.76                 | 0.62               | 4.5                          |
|                                                                                                     | 9          | 68°00'N 14°00'E  | 148         | 53.67                 | 0.71               | 4.5                          |
|                                                                                                     | 10         | 69°38'N 33°12'E  | 66          | 53.82                 | 0.68               | 1.5                          |
|                                                                                                     | 11         | 70°15'N 19°30'E  | 76          | 52.95                 | 0.76               | 3.0                          |
|                                                                                                     | 12         | 70°24'N 32°00'E  | 81          | 53.42                 | 0.77               | 1.5                          |
| Dannevig (1947)                                                                                     | 13         | 59°33'N 10°27'E  | 3242        | 51.94                 | 0.71-0.88          | 7.7                          |
| Schmidt (1930)                                                                                      | 14         | 41°18'N 70°02'W  | 70          | 52.90                 | 0.68               | 4.5                          |
|                                                                                                     | 15         | 43°59'N 68°08'W  | 58          | 53.97                 | 0.88               | 3.0                          |
|                                                                                                     | 16         | 43°36'N 62°18'W  | 93          | 54.29                 | 0.80               | 2.0                          |
|                                                                                                     | 17         | 46°00'N 61°35'W  | 72          | 53.86                 | 0.92               | 0.0                          |
|                                                                                                     | 18         | 47°35'N 59°10'W  | 49          | 54.16                 | 0.85               | 0.0                          |
|                                                                                                     | 19         | 47°34'N 52°42'W  | 65          | 54.91                 | 1.07               | 0.8                          |
|                                                                                                     | 20         | 65°23'N 52°54'W  | 467         | 53.60                 | 0.74               | 0.8                          |
|                                                                                                     | 21         | 61°00'N 47°00'W  | 200         | 53.42                 | 0.69               | 0.8                          |
|                                                                                                     | 22         | 65°40'N 37°10'W  | 183         | 53.14                 | 0.67               | 1.5                          |
|                                                                                                     | 23         | Ingonish         | 2172        | 53.96                 | 0.77               | 0.0                          |
| Mackenzie and Smith (1955)                                                                          | 24         | Canso            | 915         | 54.13                 |                    | 0.8                          |
|                                                                                                     | 25         | Quereau          | 3481        | 54.22                 |                    | 0.6                          |
|                                                                                                     | 26         | Sable Island     | 7031        | 54.04                 |                    | 1.8                          |
|                                                                                                     | 27         | St. Margaret     | 2863        | 53.86                 |                    | 1.1                          |
|                                                                                                     | 28         | Browns           | 4388        | 53.80                 |                    | 2.4                          |
| Thompson (1943)                                                                                     | 29         | Digby            | 1730        | 53.51                 |                    | 2.8                          |
|                                                                                                     | 30         | Banquereau       | 82          | 53.99                 | 0.65               | 0.6                          |
|                                                                                                     | 31         | 44°30'N 51°00'W  | 60          | 53.38                 | 0.95               | 4.5                          |
|                                                                                                     | 32         | 48°40'N 53°00'W  | 99          | 55.43                 | 0.87               | 0.8                          |
|                                                                                                     | 33         | 52°00'N 53°30'W  | 90          | 55.20                 | 1.01               | 0.2                          |
|                                                                                                     | 34         | 53°00'N 55°00'W  | 60          | 55.17                 | 0.81               | -1.0                         |
|                                                                                                     | 35         | 53°30'N 55°00'W  | 91          | 55.07                 | 0.97               | -1.0                         |
|                                                                                                     | 36         | 54°30'N 57°00'W  | 29          | 54.86                 | 0.86               | -1.0                         |
| Stanek (1968)                                                                                       | 37         | 52°30'N 52°00'W  | -           | 55.26                 | -                  | 0.0                          |
|                                                                                                     | 38         | 51°20'N 51°30'W  | -           | 55.34                 | -                  | -0.5                         |
|                                                                                                     | 39         | 50°30'N 52°30'W  | -           | 54.83                 | -                  | 0.0                          |
| Schmidt (1930)                                                                                      | 40         | 60°52'N 8°12'W   | 120         | 51.77                 | 0.64               | 8.0                          |
|                                                                                                     | 41         | 57°00'N 14°00'W  | 91          | 51.47                 | 0.62               | 8.7                          |
|                                                                                                     | 42         | 53°24'N 3°58'W   | 193         | 51.69                 | 0.64               | 7.0                          |
|                                                                                                     | 43         | 55°25'N 5°30'W   | 75          | 51.67                 | 0.62               | 7.0                          |
|                                                                                                     | 44         | 58°14'N 6°18'W   | 272         | 51.87                 | 0.55               | 7.5                          |
|                                                                                                     | 45         | 58°59'N 2°53'W   | 200         | 51.91                 | 0.61               | 6.8                          |
|                                                                                                     | 46         | 56°01'N 3°22'W   | 84          | 52.24                 | 0.61               | 5.5                          |
|                                                                                                     | 47         | 54°46'N 0°28'E   | 165         | 52.04                 | 0.64               | 5.8                          |
|                                                                                                     | 48         | 53°03'N 2°07'E   | 94          | 52.09                 | 0.74               | 5.3                          |
|                                                                                                     | 49         | 53°00'N 4°45'E   | 97          | 52.19                 | 0.63               | 5.0                          |
|                                                                                                     | 50         | 54°12'N 7°53'E   | 205         | 52.30                 | 0.63               | 4.0                          |
|                                                                                                     | 51         | 56°39'N 7°58'E   | 150         | 52.06                 | 0.65               | 4.3                          |
|                                                                                                     | 52         | 55°28'N 7°55'E   | 200         | 52.28                 | 0.55               | 4.0                          |
|                                                                                                     | 53         | 60°23'N 5°20'E   | 197         | 52.43                 | 0.67               | 4.0                          |
|                                                                                                     | 54         | 59°24'N 5°17'E   | 93          | 52.44                 | 0.74               | 4.0                          |
| Unpublished data from                                                                               |            |                  |             |                       |                    |                              |
| Seals Research<br>Division of the<br>Institute of<br>Marine<br>Environmental<br>Research (Plymouth) | 55         | Flamborough      | 465         | 52.23                 | 0.70               | 5.5                          |
|                                                                                                     | 56         | Gt. Fisher       | 600         | 52.30                 | 0.72               | 5.5                          |
|                                                                                                     | 57         | Dogger           | 531         | 52.44                 | 0.70               | 5.2                          |
|                                                                                                     | 58         | S North Sea      | 531         | 52.30                 | 0.67               | 6.0                          |
|                                                                                                     | 59         | off Hastings     | 20          | 52.25                 | 0.64               | 7.5                          |
|                                                                                                     | 60         | off Brixham      | 48          | 52.13                 | 0.84               | 9.2                          |
|                                                                                                     | 61         | S Irish Sea      | 473         | 51.72                 | 0.68               | 8.0                          |

Cont'd

Table 1 cont'd.

| Source                          | Sample No. | Area of sampling | No. of fish | Mean No. of vertebrae | Standard deviation | Temperature at spawning (°C) |
|---------------------------------|------------|------------------|-------------|-----------------------|--------------------|------------------------------|
| Lefranc (1970)<br>Present study | 62         | NE Irish Sea     | 147         | 51.56                 | 0.70               | 6.0                          |
|                                 | 63         | North Channel    | 283         | 51.72                 | 0.78               | 7.2                          |
|                                 | 64         | West of Scotland | 535         | 51.70                 | 0.69               | 8.3                          |
|                                 | 65         | off Southend     | 36          | 52.47                 | 0.61               | 6.0                          |
|                                 | 66         | E Channel        | 488         | 52.33                 | —                  | 7.5                          |
|                                 | 67         | Bristol Channel  | 209         | 51.58                 | 0.72               | 8.3                          |
|                                 | 68         | County Down      | 469         | 51.80                 | 0.69               | 7.0                          |
|                                 | 69         | NE Irish Sea     | 368         | 51.60                 | 0.87               | 6.0                          |
|                                 | 70         | S Irish Sea      | 52          | 51.67                 | 0.65               | 7.5                          |
|                                 |            |                  |             |                       |                    |                              |

The equation for the regression line plotted in Figure 1 is:

$$\overline{VS} \text{ (including urostyle)} = 54.45 - 0.361 \times T(^{\circ}\text{C})$$

The correlation coefficient ( $r$ ) is  $-0.906$  for 68 degrees of freedom (probability of  $r > 0.302$  is 0.01 for 70 d.f.). The regression accounts for 82% of the variance in vertebral count and an increase in water temperature of  $1^{\circ}\text{C}$  would be expected to give a decrease of 0.361 in  $\overline{VS}$ .

Clark and Vladykov (1960) fitted a curve to their data, but in the present case square root and log-

arithmic transformations of the vertebral count gave only very small improvements in  $r$ . The curves produced by the transformations cannot be plotted on Figure 1 because they are indistinguishable from the straight line.

Statistically significant differences in  $\overline{VS}$  between two or more populations are therefore likely to be detected when the difference in temperature at and after spawning between the two areas and also the sample size are sufficiently large. Differences in  $\overline{VS}$  would be expected between year classes from the same area as well as in samples from different areas,

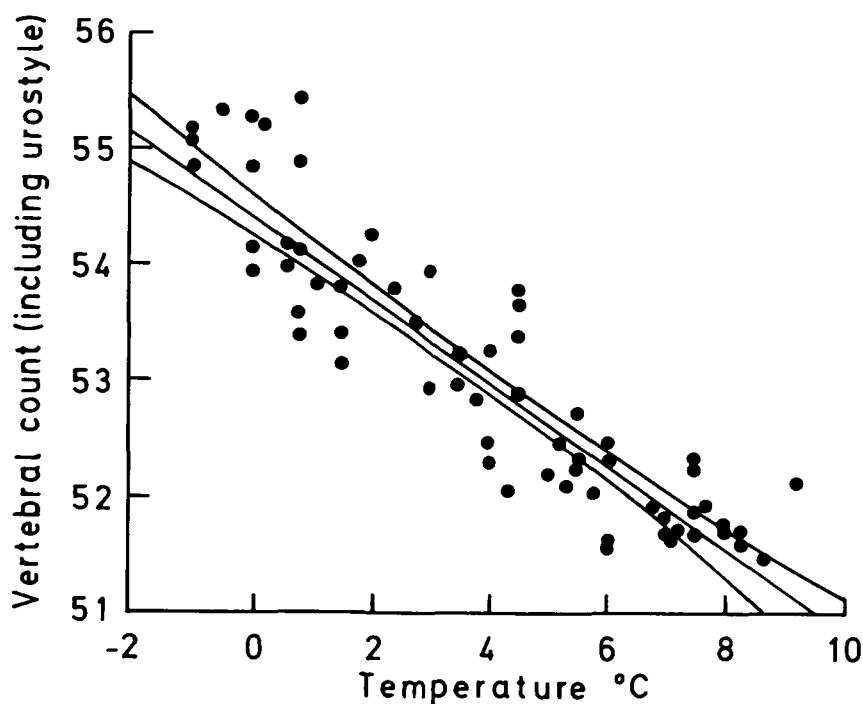

Figure 1. Relationship between temperature in the month of spawning and  $\overline{VS}$  for cod in all parts of the North Atlantic.

if the year-to-year fluctuations in temperature are sufficiently large. Table 2 shows values for five year classes of North Sea cod sampled at North Shields, Grimsby and Lowestoft. In Figure 2, which is to the same scale as Figure 1, these are plotted against March surface temperature averaged over the area sampled (data in Table 2). The regression line from Figure 1 is also shown. The  $\bar{VS}$  of the 1963 year class (Table 2) is higher than that of the other year classes, but lower than might be expected from the regression line. One explanation to this slight discrepancy is that the regression includes any inherited differences in  $\bar{VS}$  between stocks which may exist, whereas the differences between North Sea year classes are due to environmental causes. It may be that differences in  $\bar{VS}$  between stocks, which arose originally as a result of differences in water temperature acting on

the same genotype, have gradually become genetically fixed. Nevertheless, in comparing  $\bar{VS}$  for samples from different areas it is advisable to take account of the year-class composition of the sample and the annual temperature regime. But even without such detailed information it may still be possible to draw broad conclusions from aggregated data and to detect anomalies in relation to mean surface temperature and the values derived from the regression.

An example of the aggregated approach is shown in Figure 3 in which data from around the British Isles are plotted on the mean March surface temperature chart (from ICES, 1962). From the regression one would expect  $\bar{VS}$  above 52 at water temperatures below 6.8°C. Except for one sample from Orkney, where March surface temperatures are high, all the North Sea values are above 52. In the English Channel the values are also above 52, but the temperature over most of the area is above 7°C. The Eastern Channel is a transition area in which the average March surface temperature drops from over 8°C to less than 6.5°C within a short distance and for which it is therefore difficult to specify a temperature at spawning without detailed information on the fine scale distribution. In comparing his values of  $\bar{VS}$  from the Strait of Dover with those of other areas Lefranc (1970) did not include the urostyle, whereas Schmidt (1930) and Dannevig (1947) did. His conclusion, that the fish which he sampled were spawned locally, may be correct, but

Table 2.  $\bar{VS}$  of North Sea cod sampled at North Shields, Grimsby and Lowestoft and mean March surface temperature averaged over the area of sampling.

| Year class | $T(^{\circ}\text{C})$ | $\bar{VS}$ | No. of fish |
|------------|-----------------------|------------|-------------|
| 1963       | 3.3                   | 52.56      | 185         |
| 1964       | 5.1                   | 52.27      | 171         |
| 1965       | 5.1                   | 52.39      | 409         |
| 1966       | 5.7                   | 52.26      | 922         |
| 1967       | 6.4                   | 52.07      | 351         |

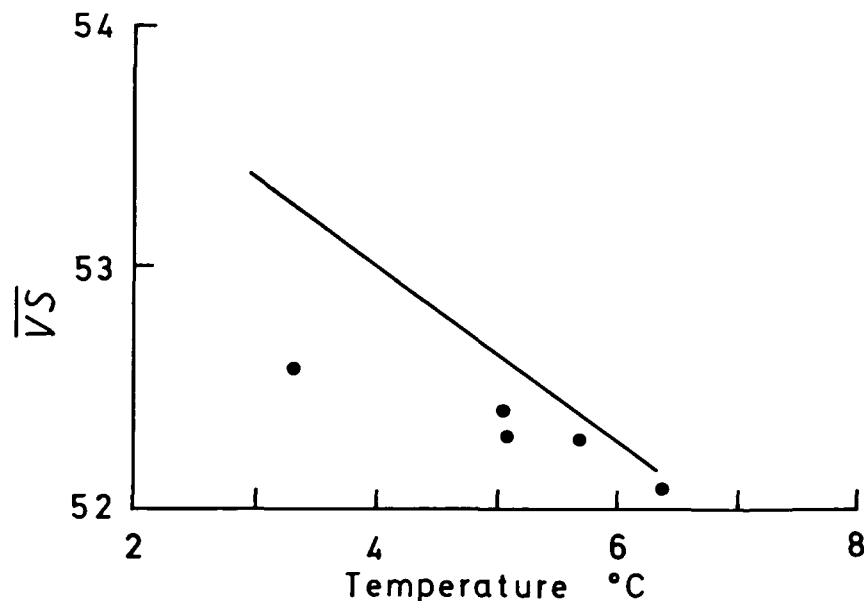

Figure 2.  $\bar{VS}$  for the 1963 to 1967 year classes from the North Sea.

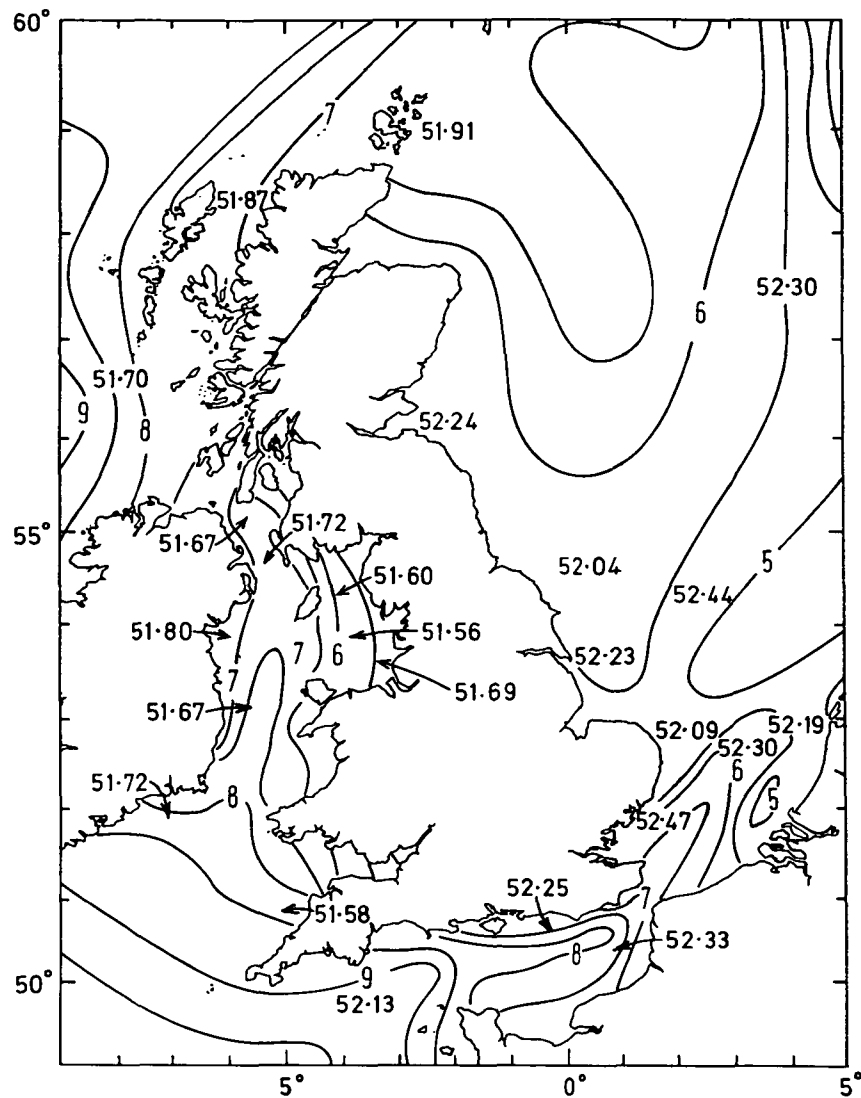

Figure 3.  $\overline{VS}$  for areas around the British Isles, plotted on the mean March surface temperature chart (from ICES, 1962).

his reasoning, that this is demonstrated by the “low” vertebral count owing to the relatively warm water in the Strait of Dover, is not. Similarly the other cod sampled in the English Channel may have originated from the relatively cold parts of the Eastern Channel or from the North Sea.

All the samples from the areas west of the British Isles show  $\overline{VS}$  below 52, in line with the generally warmer water temperatures. In the northeast Irish Sea, however, the surface temperature falls to 6°C and below in March, so that one would expect the

$\overline{VS}$  to be above 52. Instead sampling over a long period has consistently given values as low as 51.56. These low values may be due to consistent large scale migration into the area from warmer waters to the south and tagging experiments are being carried out to test this hypothesis. A positive result would still leave the problem of explaining the fate of the eggs which are spawned in the northeast Irish Sea. The possibility that the lower  $\overline{VS}$  is an inherited character can also not be excluded.

## Appendix

Appendix Table 1. Vertebral count frequencies for cod samples (sample numbers are the same as those of Table 1).

| Sample No. | 48 | 49 | 50 | 51  | No. of vertebrae |     |     |    | 55 | 56 | 57 | 58 | No. of fish |
|------------|----|----|----|-----|------------------|-----|-----|----|----|----|----|----|-------------|
|            |    |    |    |     | 52               | 53  | 54  |    |    |    |    |    |             |
| 1          | -  | -  | -  | -   | 28               | 69  | 23  | -  | -  | -  | -  | -  | 120         |
| 2          | -  | -  | -  | 4   | 63               | 163 | 54  | 3  | -  | -  | -  | -  | 287         |
| 3          | -  | -  | -  | 2   | 36               | 210 | 118 | 4  | -  | -  | -  | -  | 370         |
| 4          | -  | -  | -  | 28  | 345              | 715 | 193 | 9  | -  | -  | -  | -  | 1290        |
| 5          | -  | -  | -  | -   | 10               | 35  | 27  | 1  | -  | -  | -  | -  | 73          |
| 6          | -  | -  | -  | 4   | 66               | 92  | 24  | -  | -  | -  | -  | -  | 186         |
| 7          | -  | -  | -  | 196 | 1625             | 881 | 42  | 2  | -  | -  | -  | -  | 2746        |
| 8          | -  | -  | -  | -   | 1                | 24  | 47  | 7  | -  | -  | -  | -  | 79          |
| 9          | -  | -  | -  | -   | 6                | 52  | 75  | 15 | -  | -  | -  | -  | 148         |
| 10         | -  | -  | -  | -   | -                | 22  | 34  | 10 | -  | -  | -  | -  | 66          |
| 11         | -  | -  | -  | 2   | 18               | 38  | 18  | -  | -  | -  | -  | -  | 76          |
| 12         | -  | -  | -  | -   | 9                | 34  | 33  | 5  | -  | -  | -  | -  | 81          |
| 13         | 1  | 4  | 93 | 725 | 1729             | 654 | 35  | 1  | -  | -  | -  | -  | 3242        |
| 14         | -  | -  | -  | -   | 19               | 40  | 10  | 1  | -  | -  | -  | -  | 70          |
| 15         | -  | -  | -  | -   | 4                | 11  | 26  | 17 | -  | -  | -  | -  | 58          |
| 16         | -  | -  | -  | -   | -                | 15  | 41  | 32 | 5  | -  | -  | -  | 93          |
| 17         | -  | -  | -  | 1   | 3                | 19  | 33  | 14 | 2  | -  | -  | -  | 72          |
| 18         | -  | -  | -  | -   | -                | 11  | 22  | 13 | 3  | -  | -  | -  | 49          |
| 19         | -  | -  | -  | -   | -                | 6   | 17  | 24 | 13 | 5  | -  | -  | 65          |
| 20         | -  | -  | -  | -   | 27               | 179 | 219 | 40 | 2  | -  | -  | -  | 467         |
| 21         | -  | -  | -  | -   | 16               | 92  | 85  | 7  | -  | -  | -  | -  | 200         |
| 22         | -  | -  | -  | 2   | 28               | 96  | 57  | -  | -  | -  | -  | -  | 183         |
| 30         | -  | -  | -  | -   | 1                | 14  | 53  | 13 | 1  | -  | -  | -  | 82          |
| 31         | -  | -  | -  | 2   | 7                | 24  | 20  | 7  | -  | -  | -  | -  | 60          |
| 32         | -  | -  | -  | -   | -                | -   | 13  | 41 | 35 | 9  | 1  | -  | 99          |
| 33         | -  | -  | -  | -   | -                | 5   | 16  | 32 | 31 | 5  | 1  | -  | 90          |
| 34         | -  | -  | -  | -   | -                | -   | 11  | 26 | 20 | 3  | -  | -  | 60          |
| 35         | -  | -  | -  | -   | -                | 3   | 25  | 32 | 25 | 6  | -  | -  | 91          |
| 36         | -  | -  | -  | -   | -                | 2   | 7   | 13 | 7  | -  | -  | -  | 29          |
| 40         | -  | -  | -  | 40  | 70               | 8   | 2   | -  | -  | -  | -  | -  | 120         |
| 41         | -  | -  | 3  | 45  | 40               | 3   | -   | -  | -  | -  | -  | -  | 91          |
| 42         | -  | -  | 5  | 62  | 114              | 11  | 1   | -  | -  | -  | -  | -  | 193         |
| 43         | -  | -  | 2  | 25  | 44               | 4   | -   | -  | -  | -  | -  | -  | 75          |
| 44         | -  | -  | -  | 61  | 185              | 26  | -   | -  | -  | -  | -  | -  | 272         |
| 45         | -  | -  | 1  | 44  | 127              | 28  | -   | -  | -  | -  | -  | -  | 200         |
| 46         | -  | -  | 1  | 5   | 51               | 27  | -   | -  | -  | -  | -  | -  | 84          |
| 47         | -  | -  | -  | 31  | 97               | 37  | -   | -  | -  | -  | -  | -  | 165         |
| 48         | -  | -  | 1  | 16  | 54               | 20  | 3   | -  | -  | -  | -  | -  | 94          |
| 49         | -  | -  | 1  | 9   | 58               | 29  | -   | -  | -  | -  | -  | -  | 97          |
| 50         | -  | -  | 1  | 12  | 121              | 67  | 4   | -  | -  | -  | -  | -  | 205         |
| 51         | -  | -  | 1  | 24  | 90               | 35  | -   | -  | -  | -  | -  | -  | 150         |
| 52         | -  | -  | -  | 9   | 127              | 63  | 1   | -  | -  | -  | -  | -  | 200         |
| 53         | -  | -  | -  | 13  | 94               | 83  | 7   | -  | -  | -  | -  | -  | 197         |
| 54         | -  | -  | -  | 7   | 45               | 34  | 7   | -  | -  | -  | -  | -  | 93          |
| 55         | -  | -  | 4  | 55  | 241              | 160 | 5   | -  | -  | -  | -  | -  | 465         |
| 56         | -  | -  | 1  | 70  | 297              | 213 | 19  | -  | -  | -  | -  | -  | 600         |
| 57         | -  | -  | 3  | 35  | 241              | 232 | 20  | -  | -  | -  | -  | -  | 531         |
| 58         | -  | -  | 3  | 50  | 270              | 202 | 6   | -  | -  | -  | -  | -  | 531         |
| 59         | -  | -  | -  | 2   | 11               | 7   | -   | -  | -  | -  | -  | -  | 20          |
| 60         | -  | -  | 1  | 7   | 17               | 12  | 1   | -  | -  | -  | -  | -  | 38          |
| 61         | -  | -  | 14 | 152 | 261              | 45  | 1   | -  | -  | -  | -  | -  | 473         |
| 62         | -  | -  | 7  | 61  | 68               | 11  | -   | -  | -  | -  | -  | -  | 147         |
| 63         | -  | -  | 12 | 98  | 135              | 34  | 4   | -  | -  | -  | -  | -  | 283         |
| 64         | -  | -  | 20 | 173 | 293              | 48  | 1   | -  | -  | -  | -  | -  | 535         |
| 65         | -  | -  | -  | 2   | 15               | 19  | -   | -  | -  | -  | -  | -  | 36          |
| 67         | -  | 1  | 8  | 87  | 95               | 18  | -   | -  | -  | -  | -  | -  | 209         |
| 68         | -  | -  | 9  | 133 | 266              | 60  | 1   | -  | -  | -  | -  | -  | 469         |
| 69         | -  | 2  | 29 | 140 | 143              | 51  | 3   | -  | -  | -  | -  | -  | 368         |
| 70         | -  | -  | 1  | 19  | 28               | 4   | -   | -  | -  | -  | -  | -  | 52          |

## References

- Clark, J. R. & Vladykov, V. D. 1960. Definition of had-dock stocks of the northwestern Atlantic. Fishery Bull. Fish. Wild. Serv. U.S. 60 (169): 283-96.
- Dannevig, A. 1947. The number of vertebrae and rays of the second dorsal fin of fishes from the Norwegian Skagerak coast. *Annls biol.*, Copenh., 2: 131-46.
- Fahy, W. E. 1972. Influence of temperature change on number of vertebrae and caudal fin rays in *Fundulus majalis* (Walbaum). *J. Cons. int. Explor. Mer*, 34: 217-32.
- Hydrographic Office, U. S. Navy Dept. 1944. World atlas of sea surface temperatures. H. O. 225, U. S. Navy, Washington D. C., 48 plates.
- ICES, 1962. Mean monthly temperature and salinity of the surface layer of the North Sea and adjacent waters from 1905 to 1954. Charlottenlund Slot, ICES Hydrographic Service, 1962, 24 charts.
- ICNAF, 1968. Environmental surveys Norwestlant 1-3, Part II, Atlas. Int. Comm. NW Atlant. Fish., Spec. Publ. No. 7 (2): 286 pp.
- Lefranc, G. 1970. Contribution à la connaissance de la biologie de la morue du sud de la Mer du Nord et de la Manche orientale. *Revue Trav. Inst. (scient. tech.) Pêch. marit.*, 34 (3): 277-96.
- Mackenzie, R. A. & Smith, G. F. M. 1955. Atlantic cod populations along the southern Canadian mainland as shown by vertebral count studies. *J. Fish. Res. Bd Can.*, 12 (5): 698-705.
- Postolaky, A. I. 1968. The life-cycle pattern of Labrador cod *Gadus morhua* L. in ICNAF Subarea 2. Int. Comm. NW Atlant. Fish., Spec. Publ. No. 7 (1): 139-44.
- Purdom, C. E. & Wyatt, T. 1969. Racial differences in the Irish Sea and North Sea plaice (*Pleuronectes platessa*). *Nature, Lond.*, 222: 780-1.
- Schmidt, J. 1930. The Atlantic cod and local races of the same. *C. R. Lab. Carlsberg*, 18 (6): 1-71.
- Stanek, E. 1968. The number of rays in the second dorsal fin and the number of vertebrae in cod from Labrador, Newfoundland and Nova Scotia. Int. Comm. NW Atlant. Fish., Res. Doc. 68/71: 4 pp.
- Stefansson, U. 1962. North Icelandic waters. *Rit Fiskideild*, 3: (1): 269 pp.
- Táning, A. V. 1946. Studies of determination of vertebrae in teleostean fishes. *Nature, Lond.*, 157: 594.
- Thompson, H. 1943. A biological and economic study of cod in the Newfoundland area. *Newfld Res. Bull.*, 14: 160 pp.
